# Supplementary material for: miR-135a Suppresses Granulosa Cell Growth by Targeting Tgfbr1 and Ccnd2 during Folliculogenesis in Mice
Source: MDPI journal article supplement (doi:10.3390/cells10082104), 2021-08-17
Supplement: s1 [file s1]

**Table S1. Sequences of primers and oligos (5'-3').**

| <b>Primer name</b> | <b>Sequences (5'-3')</b>                         | <b>Application</b> |
|--------------------|--------------------------------------------------|--------------------|
| miR-135a-Loop      | CTCAACTGGTGTCGTGGAGTCGGCAATTCA<br>GTTGAGTCACATAG | qPCR               |
| U6-Loop            | CAGTTGAGAAAAATATGGAACGCT                         |                    |
| miR-135a-qPCR-F    | CTGGTAGGTATGGCTTTTAT                             | qPCR               |
| miR-135a-qPCR-R    | TCAACTGGTGTCGTGGAG                               |                    |
| U6-F               | CTGGTAGGGTGCTCGCTTCGGCAG                         | qPCR               |
| U6-R               | CAACTGGTGTCGTGGAGTCGGC                           |                    |
| Tgfb1-qPCR-F       | TGGGCTTAGTGTTCTGG                                | qPCR               |
| Tgfb1-qPCR-R       | CTGTTGGCTGAGTTGTGA                               |                    |
| Ccnd2-qPCR-F       | GGGAAGTGGTAGTGTTGGGTAAG                          | qPCR               |
| Ccnd2-qPCR-R       | AATCATCGACGGCGGGTAC                              |                    |
| Luc-miR-135a-D4-   | TAAGCCTGTCTGGTCCTCAGAATCGATCTA                   | site-directed      |
| Mut1-F             | CCTTGCTTAC                                       |                    |
| Luc-miR-135a-D4-   | TAAGACTGAGAAGGAGGTAAGCAAGGTAG                    | mutagenesis PCR    |
| Mut1-R             | ATCGATTCTGAGGACC                                 |                    |
| Luc-miR-135a-D4-   | ACACACACAGGAGCCAGGCTTATGAATCA                    | site-directed      |
| Mut2-F             | TGGCCCA                                          |                    |
| Luc-miR-135a-D4-   | TCTAGCTAGAAGTTGGGCCATGATTCATAA                   | mutagenesis PCR    |
| Mut2-R             | GCCTGGCTCC                                       |                    |
| Ccnd2-ChIP-F       | TCTGTGCAGGATAACACCGAGAC                          | ChIP-qPCR          |
| Ccnd2-ChIP-R       | CTATCAATGGCAGCGGGAAT                             |                    |
| miR-135a-ChIP-F    | TCCACTTCCCTAAGCCTGTC                             | ChIP-qPCR          |
| miR-135a-ChIP-R    | ATGAGCGAGCAATAGAATCAC                            |                    |
| siRNA-NC           | UUCUCCGAACGUGUCACGUTT                            | siRNA              |
| siRNA-Ccnd2        | CCAAGCUGAAAGAGACCAUTT                            | siRNA              |
| siRNA-Tgfb1        | CCAGGACCAUUGUGUUACATT                            | siRNA              |
