# Supplementary material for: miR-135a Suppresses Granulosa Cell Growth by Targeting Tgfbr1 and Ccnd2 during Folliculogenesis in Mice
Source: MDPI journal article supplement (doi:10.3390/cells10082104), 2021-08-17
Supplement: s1 [file s1]

A

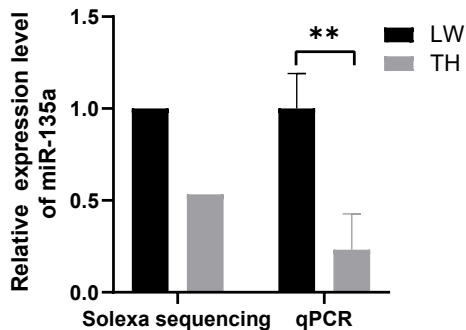

B

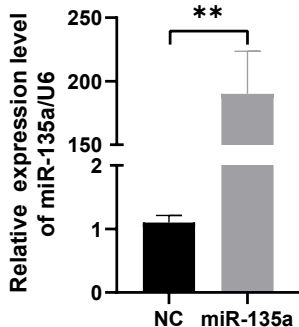

C

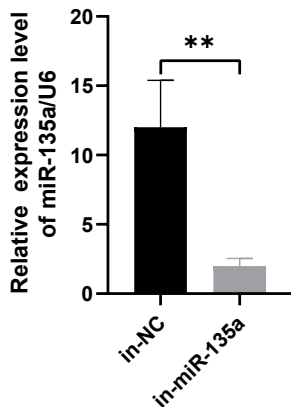

**Figure S1. qPCR analysis of miR-135a in porcine follicles and murine GCs.** (A) qPCR analysis of miR-135a expression in pre-ovulatory ovarian follicles between Large White (LW) and Chinese Taihu (TH) sows. (B) miR-135a overexpression in mGCs. (C) miR-135a inhibition in mGCs. The means  $\pm$  SD were calculated from three independent experiments. \*\* $P < 0.01$ .
